# Supplementary material for: Ankle-Brachial Index and Arterial Stiffness, Modulate the Exertional Capacity of High-Frequency Training Athletes
Source: MDPI journal article supplement (doi:10.3390/jcdd9090312), 2022-09-19
Supplement: s1 [file s1]

Supplementary Table S1: Variation in blood pressure, heart rate and rate pressure product during the Treadmill Stress Test according to type of sport.

|                             | Blood Pressure | Heart rate      | Rate Pressure Product |
|-----------------------------|----------------|-----------------|-----------------------|
| *                           |                |                 |                       |
| Fixed                       |                |                 |                       |
| Intercept                   | 115.32 (1.98)* | 61.14 (2.53)*   | 6.86 (0.46)*          |
| Time (linear term)          | 8.23 (1.64)*   | 18.40 (2.54)*   | 3.58 (0.41)*          |
| Time (quadratic term)       | -1.02 (0.58)   | -1.72 (0.87)‡   | -0.60 (0.15)*         |
| Time (cubic term)           | 0.24 (0.06)*   | 0.27 (0.08)†    | 0.10 (0.01)*          |
| Time spent in the TST       | -0.16 (0.13)   | -0.43 (0.15)†   | -0.10 (0.03)*         |
| Rate of change              |                |                 |                       |
| Runners vs soccer           | -6.74 (1.83)*  | -0.30 (2.53)    | -1.15 (0.43)†         |
| Sport * time (linear)       | 9.48 (2.08)*   | 2.30 (3.23)     | 2.04 (0.52)*          |
| Sport * time (quadratic)    | -3.95 (0.74)*  | -1.58 (1.10)‡   | -0.91 (0.18)*         |
| Sport * time (cubic)        | 0.41 (0.07)*   | 0.24 (0.10)*    | 0.11 (0.02)*          |
| Variance Components         |                |                 |                       |
| Within Person               | 13.24 (0.86)   | 27.38 (1.44)*   | 0.81 (0.04)*          |
| In 1st grade status         | 13.47 (20.29)  | 0.01 (0.01)     | 0.01 (0.01)           |
| Linear term                 |                |                 |                       |
| Variance                    | 22.65 (26.70)  | 129.80 (29.17)* | 1.66 (0.69)‡          |
| Covar with 1st grade status | -14.72 (22.64) | -40.30 (11.83)* | -0.61 (0.29)†         |
| Quadratic Term              |                |                 |                       |
| Variance                    | 8.20 (3.20)†   | 21.68 (4.16)*   | 0.58 (0.10)*          |
| Covar with 1st grade status | 13.86 (7.68)‡  | 22.88 (5.12)*   | 0.78 (0.13)*          |
| Covar with linear term      | -15.43 (9.13)‡ | -52.90 (10.86)* | -1.10 (0.25)*         |
| Cubic Term                  |                |                 |                       |
| Variance                    | 0.11 (0.03)*   | 0.22 (0.04)*    | 0.008 (0.001)*        |
| Covar with 1st grade status | -1.89 (0.75)‡  | -2.54 (0.56)*   | -0.11 (0.02)*         |
| Covar with linear term      | 1.98 (0.89)‡   | 5.20 (1.09)*    | 0.14 (0.03)*          |
| Muscle mass (percentage)    | 81.49 (3.58)   | 81.70 (3.20)    | 0.64                  |

p<0.001; † p<0.01; ‡ p<0.05

Supplementary Table S2: Variation in blood pressure, heart rate and in the rate pressure product during the Treadmill Stress Test (TST) according to Ankle brachial index.

|                             | Blood Pressure | Heart rate      | Rate Pressure Product |
|-----------------------------|----------------|-----------------|-----------------------|
| <b>Fixed</b>                |                |                 |                       |
| Intercept                   | 113.22 (1.75)* | 56.35 (2.17)*   | 5.88 (0.39)*          |
| Time (linear term)          | 10.40 (1.07)*  | 22.28 (1.69)*   | 4.56 (0.29)*          |
| Time (quadratic term)       | -1.97 (0.40)*  | -3.30 (0.59)*   | -1.00 (0.10)*         |
| Time (cubic term)           | 0.33 (0.04)*   | 0.45 (0.06)*    | 0.15 (0.01)*          |
| Time spent in the TST       | -0.10 (0.14)   | 4.56 (0.70)*    | 0.50 (0.13)‡          |
| Runners vs soccer           | 0.92 (0.61)    | -0.33 (0.16)‡   | -0.07 (0.03)*         |
| <b>Rate of change</b>       |                |                 |                       |
| ABI <0.9 vs ABI ≥0.9        | -17.86 (2.17)* | 3.71 (3.17)     | -1.82 (0.55)*         |
| ABI * time (linear)         | 20.06 (2.49)*  | -13.46 (3.94)*  | 1.52 (0.67)‡          |
| ABI * time (quadratic)      | -8.10 (0.86)*  | 3.28 (1.37)‡    | -0.91 (0.24)*         |
| ABI * time (cubic)          | 0.87 (0.09)*   | -0.17 (0.13)    | 0.12 (0.03)*          |
| <b>Variance Components</b>  |                |                 |                       |
| Within Person               | 12.74 (0.67)*  | 27.45 (1.45)*   | 0.81 (0.04)*          |
| In 1st grade status         | 0.01 (0.01)    | 0.01 (0.01)     | 0.01 (0.01)           |
| <b>Linear term</b>          |                |                 |                       |
| Variance                    | 7.93 (9.47)    | 93.22 (26.64)*  | 2.29 (0.69)*          |
| Covar with 1st grade status | -0.28 (4.16)   | -28.43 (11.17)‡ | -0.90 (0.29)‡         |
| <b>Quadratic Term</b>       |                |                 |                       |
| Variance                    | 4.75 (1.30)*   | 19.88 (4.04)*   | 0.64 (0.11)*          |
| Covar with 1st grade status | 6.61 (1.70)†   | 21.11 (5.03)*   | 0.85 (0.13)*          |
| Covar with linear term      | -7.99 (3.38)*  | -44.22 (10.26)* | -1.32 (0.27)*         |
| <b>Cubic Term</b>           |                |                 |                       |
| Variance                    | 0.07 (0.02)*   | 0.23 (0.04)*    | 0.008 (0.001)*        |
| Covar with 1st grade status | -1.00 (0.20)‡  | -2.63 (0.57)*   | -0.11 (0.02)*         |
| Covar with linear term      | 1.06 (0.34)*   | 4.79 (1.05)*    | 0.16 (0.03)*          |
| Covar with quadratic term   | -0.57 (0.14)*  | -2.13 (0.42)*   | -0.07 (0.01)*         |

\* p<0.001; † p<0.01; ‡ p<0.05
